# Supplementary material for: An Mn 2+ -coordinated glycyrrhizic acid self-adjuvating hydrogel for sustained codelivery of an antigen and Mn 2+ for a potent immune response
Source: Royal Society of Chemistry journal article supplement (doi:10.1039/d5nr04283f), 2026-01-01
Supplement: d5nr04283f1.pdf [file d5nr04283f1.pdf]

## Supporting Information

### **Mn<sup>2+</sup>-Coordinated Glycyrrhizic Acid Self-Adjuvating Hydrogel for Sustained Codelivery of Antigen and Mn<sup>2+</sup> for a Potent Immune Response**

Jingjing Zhou<sup>a</sup>, Shengying Zhang<sup>a</sup>, Hu Dong<sup>a</sup>, Yunhua Li<sup>b</sup>, Haoyue Zang<sup>a</sup>, Zhidong Teng<sup>a</sup>, Mingyang Zhang<sup>a</sup>, Yifan Liu<sup>a</sup>, Shiqi Sun<sup>a\*</sup>, Huichen Guo<sup>a\*</sup>

- a. State Key Laboratory of Animal Disease Control and Prevention, College of Veterinary Medicine, Lanzhou University, Lanzhou Veterinary Research Institute, Chinese Academy of Agricultural Sciences, Lanzhou, China.
- b. College of Chemistry and Chemical Engineering, Lanzhou University, Lanzhou, China.

\*Corresponding authors: [sunshiqi@caas.cn](mailto:sunshiqi@caas.cn) (S. Sun); [guohuichen@caas.cn](mailto:guohuichen@caas.cn) (H. Guo);

**Table S1.** The cGAS-STING pathway related gene and their primers used in this study.

| Primer        | Forward (5'-3')         | Reverse (5'-3')         |
|---------------|-------------------------|-------------------------|
| GAPDH         | AGGTCGGTGTGAACGGATTTG   | TGTAGACCATGTAGTTGAGGTCA |
| TNF- $\alpha$ | CCCTCACACTCAGATCATCTTCT | GCTACGACGTGGGCTACAG     |
| IL-6          | CTTCTTGGGACTGATGCTGGT   | AGACAGGTCTGTTGGGAGTGG   |
| IRF3          | GAGAGCCGAACGAGGTTTCAG   | CTTCCAGGTTGACACGTCCG    |
| NF-kB         | CCAAAGCTCCCGAAACCAATC   | GAGTAGCCGCCGTAATAGGC    |
| TBK1          | ACTGGTGATCTCTATGCTGTCA  | TTCTGGAAGTCCATACGCATTG  |
| CCL-2         | ATGCAGTTAACGCCCCACTC    | CTGCTGCTGGTGATCCTCTT    |
| CCL-3         | CGGAAGATTCCACGCCAATTC   | TCTTTGGAGTCAGCGCAGAT    |
| CXCL-2        | CCAGTGAAGTGCCTGTCAA     | GGGCGTCACACTCAAGCTCT    |
| CXCL-5        | GAGCTGCGTTGTGTTTGCTT    | GCTATGACTTCCACCGTAGGG   |

**Table S2.** The GC B related gene and their primers used in this study.

| Primer | Forward (5'-3')       | Reverse (5'-3')         |
|--------|-----------------------|-------------------------|
| GAPDH  | AGGTCGGTGTGAACGGATTTG | TGTAGACCATGTAGTTGAGGTCA |
| Bcl-6  | CGGAAGGGTCTGGTTAGT    | CATTCTGATTGAGGCTGTTG    |
| Bach2  | CATTCTGATTGAGGCTGTTG  | ACTGGAGTGTTCCGGTTGGT    |

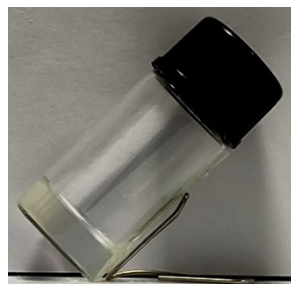

**Fig. S1.** Optical image of GAgel.

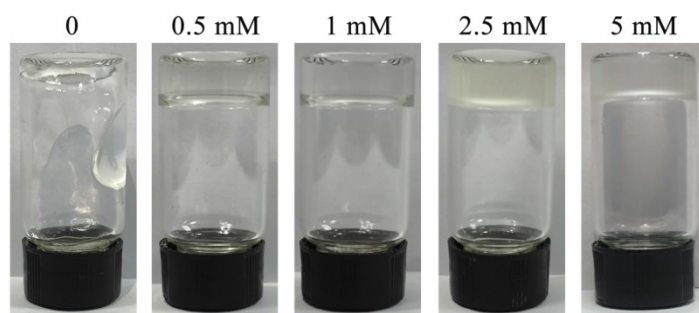

**Fig. S2.** Effect of different MnCl<sub>2</sub> concentrations on the formation of the GA@Mn hydrogel. The concentration of GA was 3% (w/v).

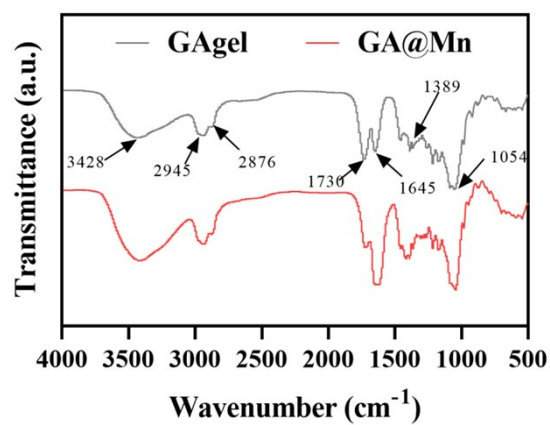

**Fig. S3.** The FTIR spectra of GAgel and GA@Mn.

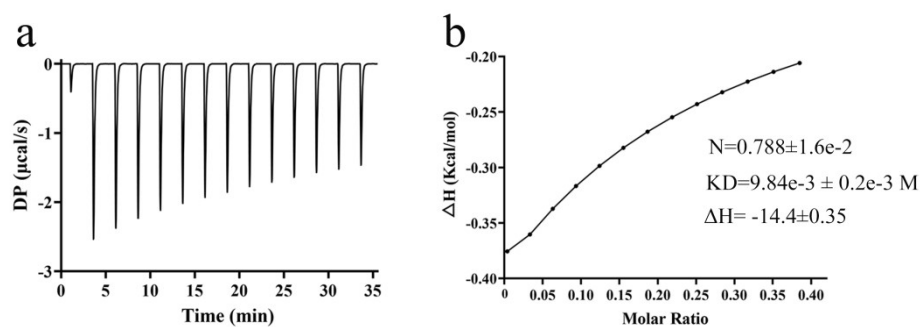

**Fig. S4.**  $\text{Al}^{3+}$  titration curve with GA and the derived thermodynamic parameters.

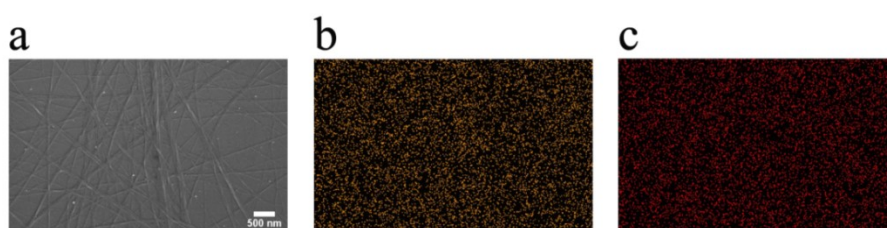

**Fig. S5.** (a) SEM image of the GA@Al microstructure and EDS elemental mapping of (b) carbon (C) and (c) aluminum (Al) in GA@Al.

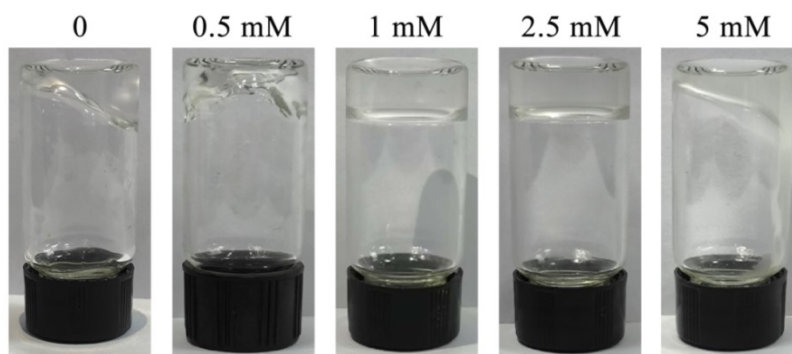

**Fig. S6.** Effect of different  $\text{AlCl}_3$  concentrations on the formation of the GA@Al hydrogel. The concentration of GA was 3% (w/v).

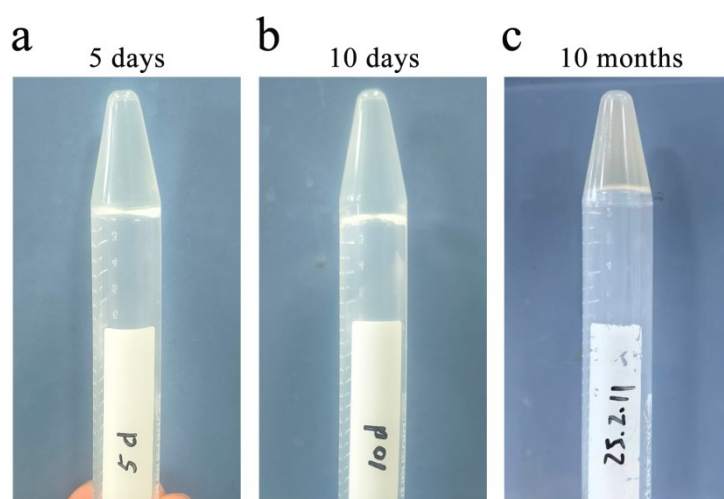

**Fig. S7.** State of the GA@Mn hydrogel after storage at room temperature for 5 days (a), 10 days (b), and 10 months (c).

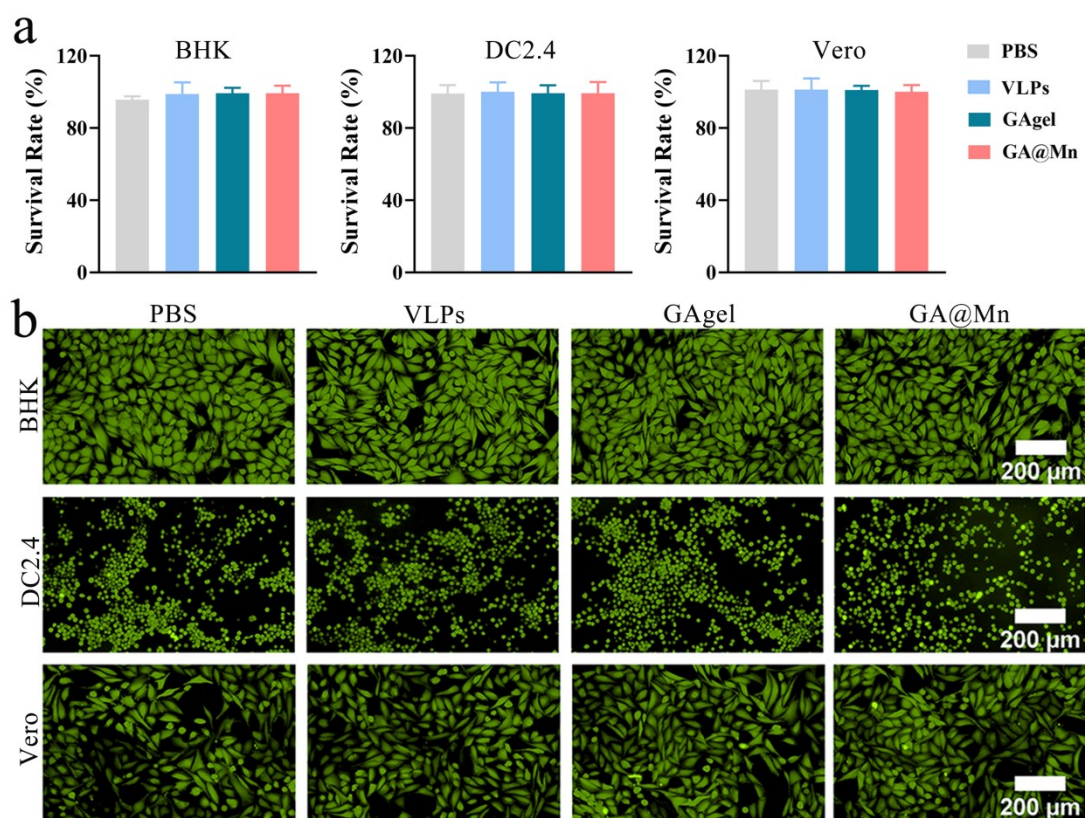

**Fig. S8.** Cytocompatibility of GA@Mn. (a) Viability of BHK, DC2.4 and Vero cells treated with PBS, VLPs, GAgel, and GA@Mn, assessed via MTS assay. (b) Live/dead staining images (Calcein-AM/PI) of BHK, DC2.4 and Vero cells after different treatment. Scale bar: 200 μm.

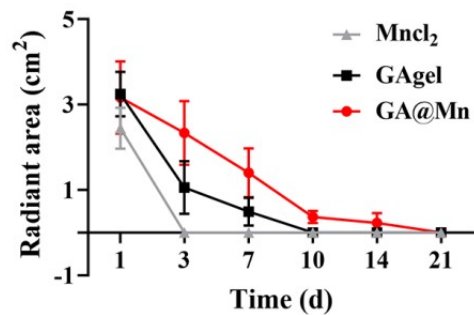

**Fig. S9.** *In vivo* radiant area of mice injected with MnCl<sub>2</sub>, GAgel, and GA@Mn containing FITC-OVA.

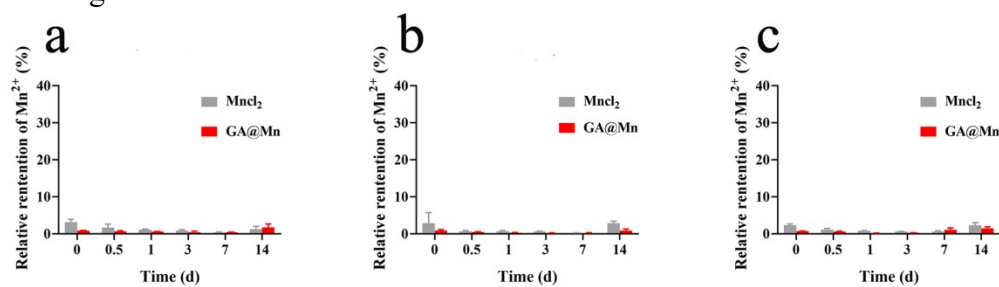

**Fig. S10.** Mn<sup>2+</sup> content in heart (a), spleen (b), and lung (c) of mice injected with MnCl<sub>2</sub> or GA@Mn.

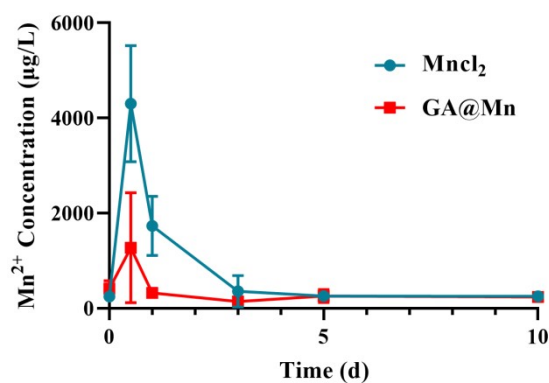

**Fig. S11.** Serum Mn<sup>2+</sup> concentration. The concentration of Mn<sup>2+</sup> in mouse serum was measured by ICP-MS at 0, 0.5, 1, 3, 5, and 10 days after injection of MnCl<sub>2</sub> or GA@Mn, respectively.

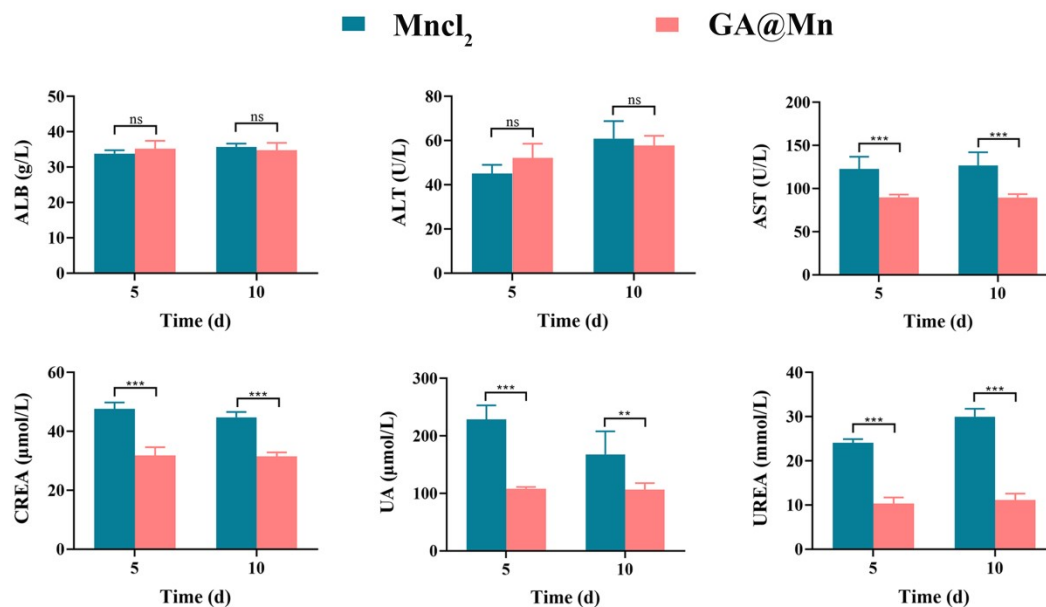

**Fig. S12.** Blood biochemical analysis. Blood biochemical analysis (ALB, ALT, AST, CREA, UA, UREA) on days 5 and 10 after injection of  $MnCl_2$  or  $GA@Mn$ , respectively.

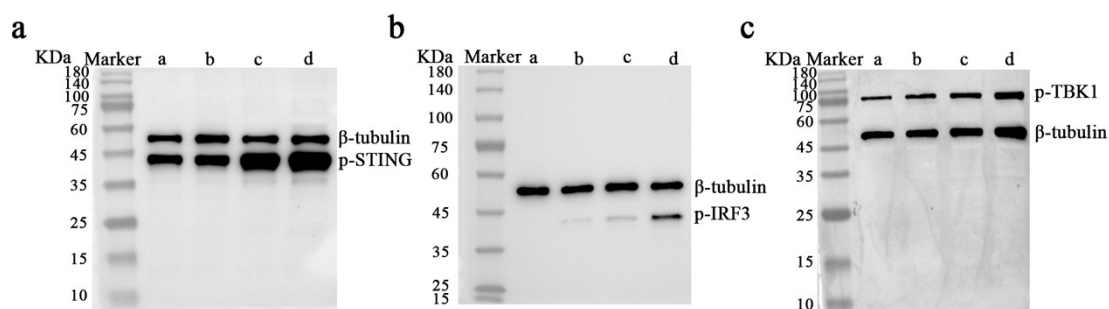

**Fig. S13.** The results of WB analysis of phosphorylation levels of cGAS-STING-related signaling proteins in DC 2.4.

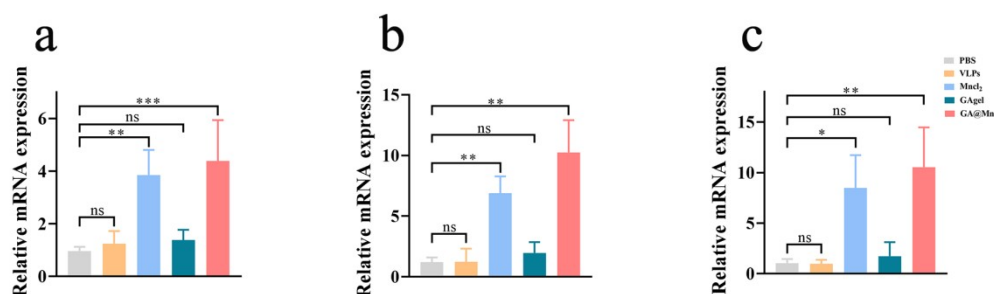

**Fig. S14.** RT-PCR analysis of IRF-3 (a), NF- $\kappa$ B (b), and TBK1 (c) mRNA levels at the injection site across treatment groups.

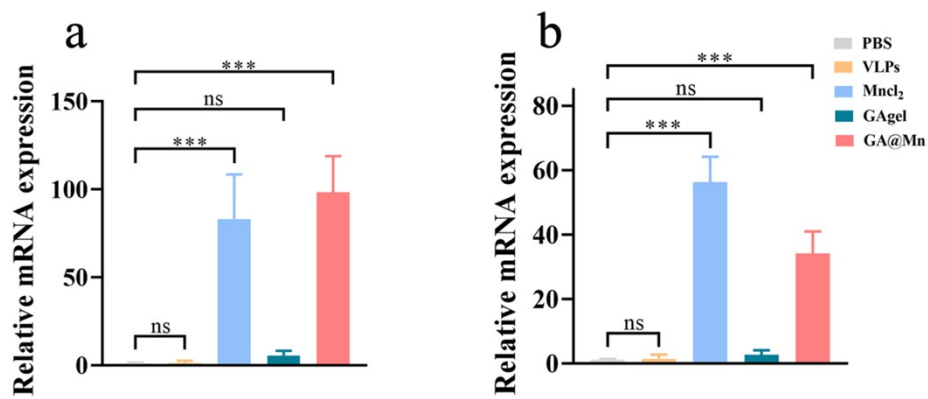

**Fig. S15.** RT-PCR analysis of TNF- $\alpha$  (a) and IL-6 (b) mRNA levels at the injection site across treatment groups.

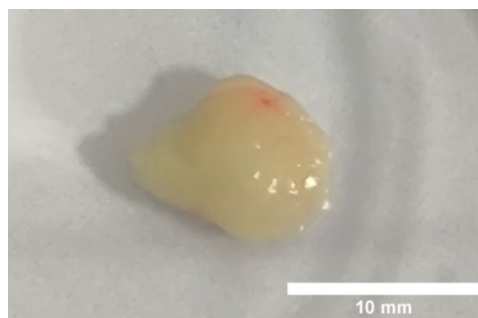

**Fig. S16.** Image of nodule formed up to 5 days after injection of GA@Mn *in vivo*.

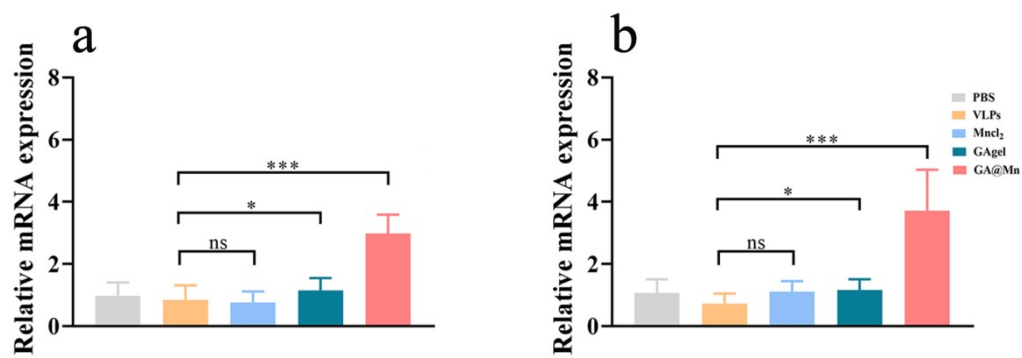

**Fig. S17.** RT-PCR analysis of Bcl6 (a) and Bach2 (b) mRNA levels in lymph node across treatment groups.



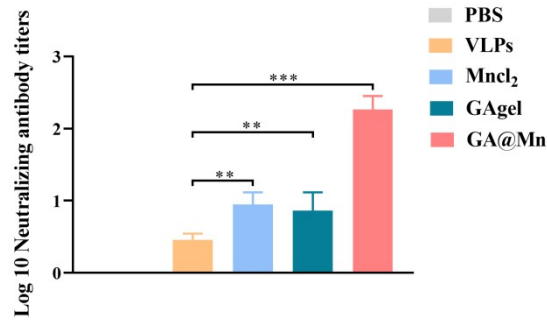

**Fig. S18.** Antigen-specific neutralizing antibody titers in serum on day 28 post-immunization.

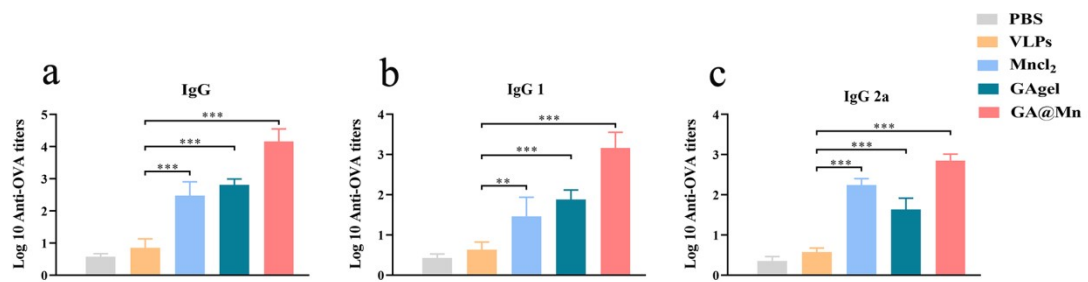

**Fig. S19** ELISA analysis of OVA-specific IgG (a), IgG1 (b), and IgG2a (c) levels in serum on day 28 post-immunization.

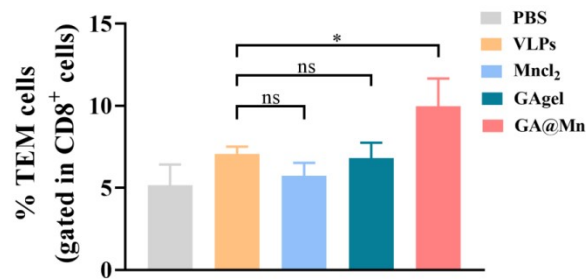

**Fig. S20.** Flow cytometry of TEM percentages among splenic CD8<sup>+</sup> T cells.

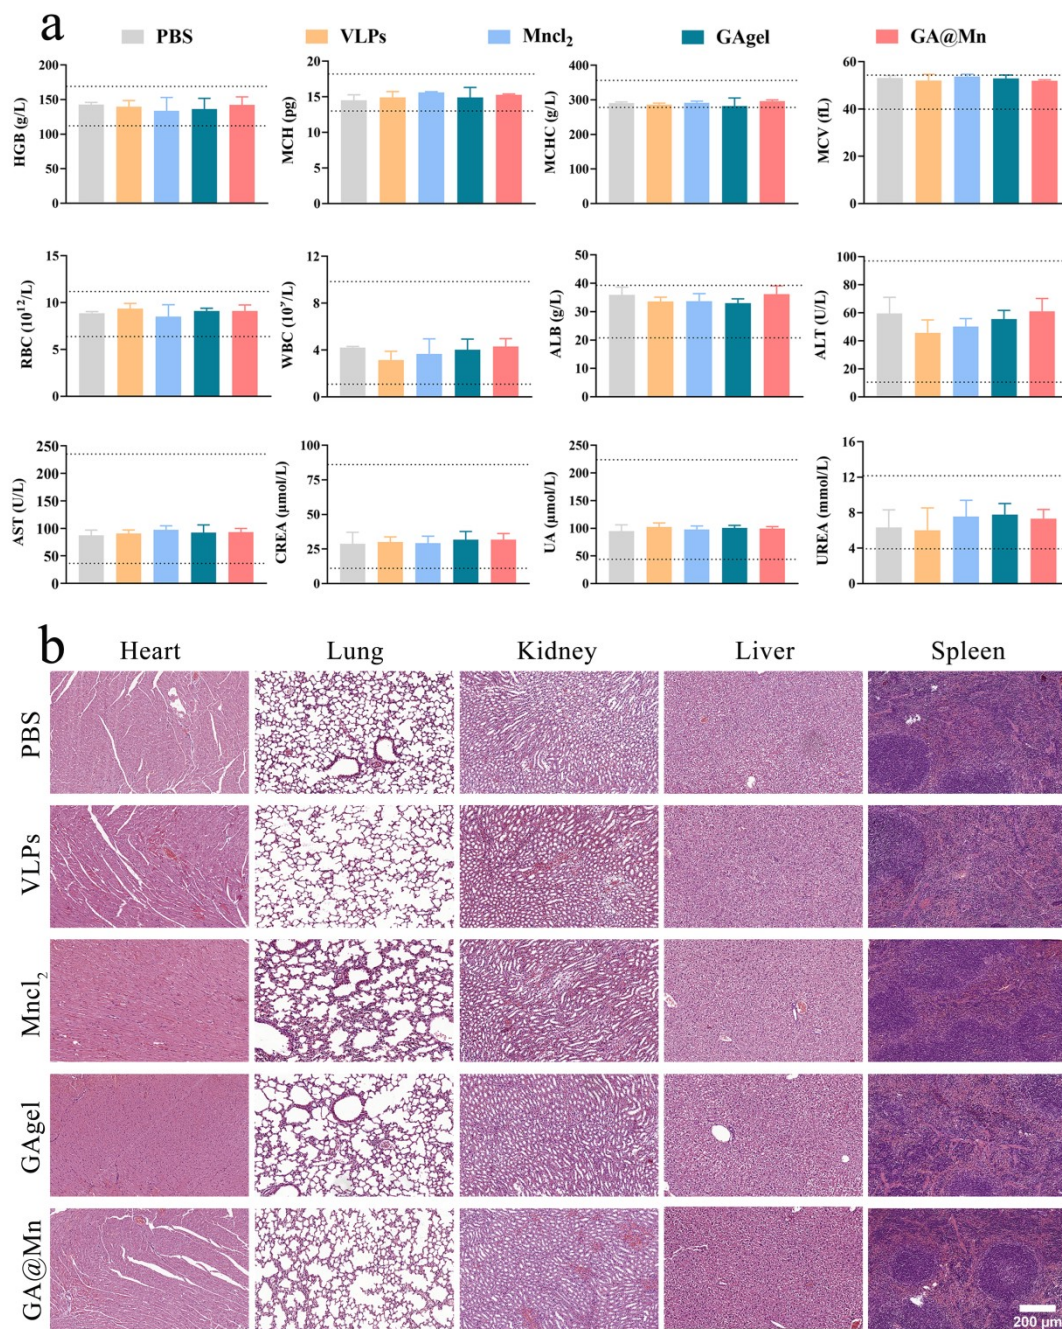

**Fig. S21. *In vivo* biocompatibility. (a) Routine blood analysis (HGB, MCH, MCHC, MCV, RBC, WBC) and blood biochemistry analysis (ALB, ALT, AST, CREA, UA, UREA) from mice 56 days post-immunization. **(b)** Representative H&E staining of major organs from mice 56 days post-immunization. Scale bar: 200 μm.**
